# Supplementary material
Source: PubMed Central journal article supplement (PMC5947948)
Supplement: EHP1062.s001.acco.pdf [file EHP1062.s001.acco.pdf]

**Note to readers with disabilities:** *EHP* strives to ensure that all journal content is accessible to all readers. However, some figures and Supplemental Material published in *EHP* articles may not conform to [508 standards](#) due to the complexity of the information being presented. If you need assistance accessing journal content, please contact [ehp508@niehs.nih.gov](mailto:ehp508@niehs.nih.gov). Our staff will work with you to assess and meet your accessibility needs within 3 working days.

### **Supplemental Material**

#### **Exposure to Perfluoroalkyl Substances and Metabolic Outcomes in Pregnant Women: Evidence from the Spanish INMA Birth Cohorts**

Nuria Matilla-Santander, Damaskini Valvi, Maria-Jose Lopez-Espinosa, Cyntia B. Manzano-Salgado, Ferran Ballester, Jesús Ibarluzea, Loreto Santa-Marina, Thomas Schettgen, Monica Guxens, Jordi Sunyer, and Martine Vrijheid

#### **Table of Contents**

**Figure S1.** Flow chart of the included women for the study.

**Table S1.** P-gain values from the generalized additive models (GAMs) for the linearity of the relationships between continuous log<sub>10</sub>-transformed PFAS and metabolic outcomes in pregnant women.

**Table S2.** Multipollutant-adjusted associations between PFAS plasma concentrations and odds for GDM and IGT in pregnant women.

**Table S3.** Multipollutant-adjusted associations between PFAS plasma concentrations and metabolic serum biomarkers in pregnant women.

**Figure S1.** Flow chart of the included women for the study.

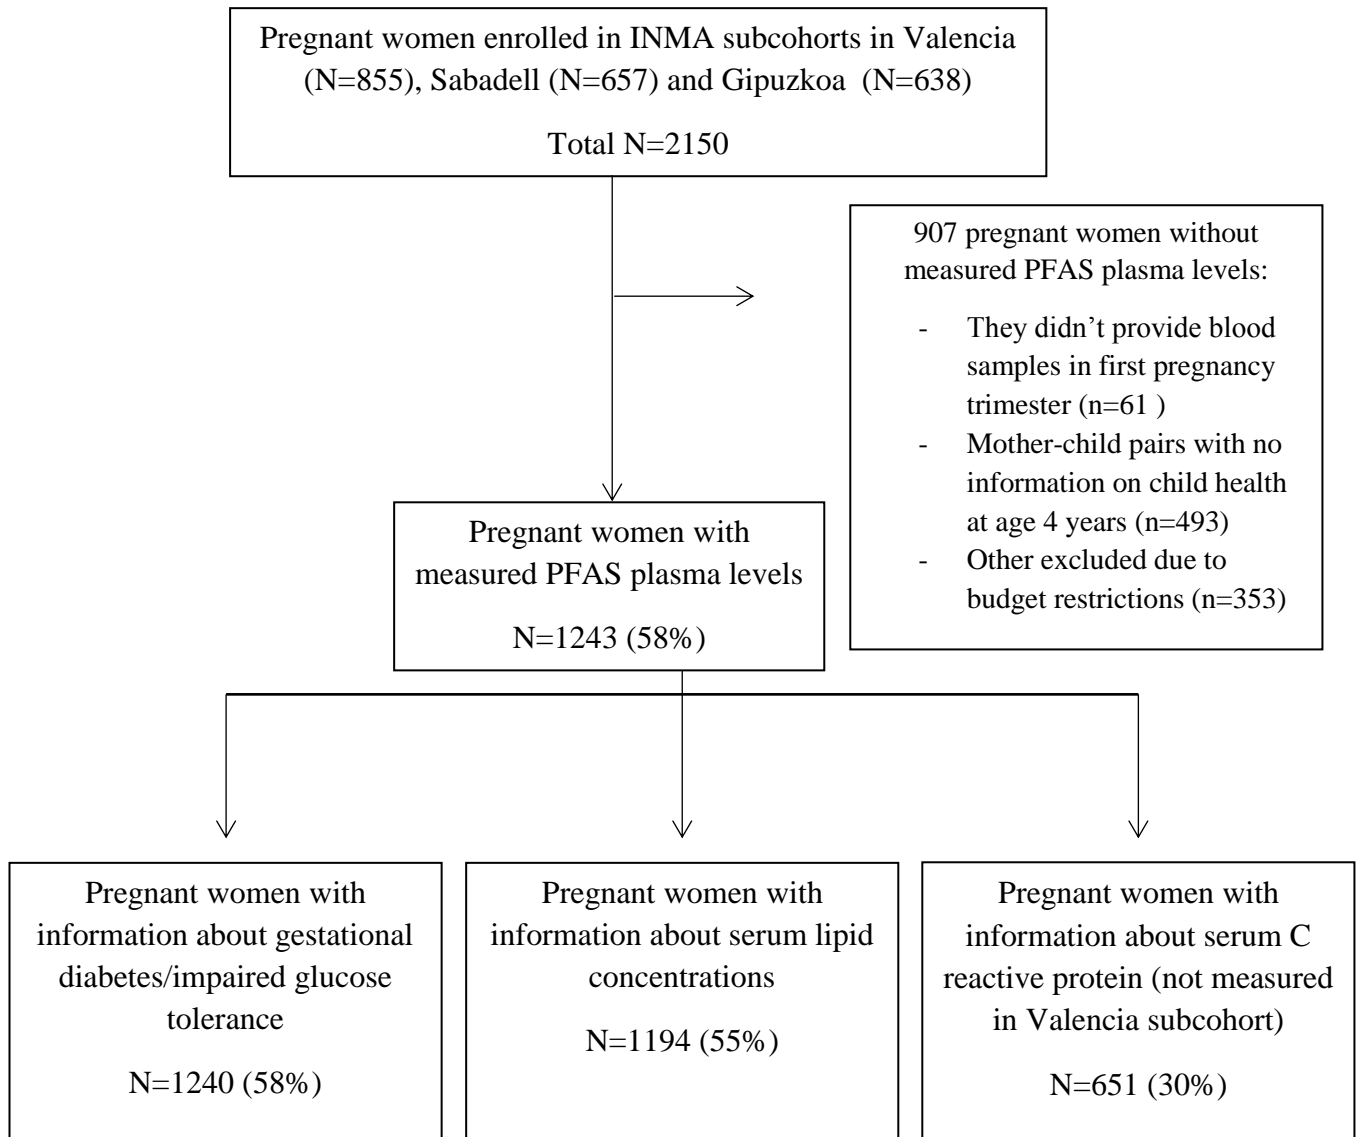

**Table S1. P-gain values from the generalized additive models (GAMs) for the linearity of the relationships between continuous log<sub>10</sub>-transformed PFAS and metabolic outcomes in pregnant women.**

|                                      | <b>PFOA log<sub>10</sub>-transformed</b> | <b>PFOS log<sub>10</sub>-transformed</b> | <b>PFHxS log<sub>10</sub>-transformed</b> | <b>PFNA log<sub>10</sub>-transformed</b> |
|--------------------------------------|------------------------------------------|------------------------------------------|-------------------------------------------|------------------------------------------|
| <b>Impaired Glucose Tolerance</b>    | 0.08                                     | 0.12                                     | 0.11                                      | 0.04                                     |
| <b>Gestational Diabetes Mellitus</b> | 0.13                                     | 0.39                                     | 0.21                                      | 0.04                                     |
| <b>Triglycerides (mg/dL)</b>         | 0.15                                     | 0.22                                     | 0.09                                      | 0.02                                     |
| <b>Cholesterol (mg/dL)</b>           | 0.17                                     | 0.14                                     | 0.27                                      | 0.24                                     |
| <b>C-Reactive Protein (mg/dL)</b>    | 0.10                                     | 0.08                                     | 0.06                                      | 0.04                                     |

Abbreviations: PFOA (perfluorooctanoate), PFOS (perfluorooctane sulfonate), PFHxS (perfluorohexane sulfonate), PFNA (perfluorononanoate).

**Table S2. Multipollutant-adjusted associations between PFAS plasma concentrations and odds for GDM and IGT in pregnant women.**

|              |                                           | Gestational diabetes<br>(GDM)<br>(n=1214)  |                          | Impaired Glucose Tolerance<br>(IGT)<br>(n=1214) |                          |
|--------------|-------------------------------------------|--------------------------------------------|--------------------------|-------------------------------------------------|--------------------------|
|              |                                           | N of<br>GDM<br>cases/<br>GDM-free<br>women | OR <sup>a</sup> (95% CI) | N of IGT cases<br>/IGT-free<br>women            | OR <sup>a</sup> (95% CI) |
| <b>PFOA</b>  |                                           |                                            |                          |                                                 |                          |
|              | <i>Q1</i>                                 | 10/295                                     | ref                      | 21/284                                          | ref                      |
|              | <i>Q2</i>                                 | 14/292                                     | 1.16 (0.46,2.93)         | 34/272                                          | 1.01 (0.52,1.96)         |
|              | <i>Q3</i>                                 | 15/287                                     | 1.30 (0.48,3.51)         | 41/261                                          | 1.04 (0.51,2.15)         |
|              | <i>Q4</i>                                 | 14/287                                     | 1.45 (0.46,4.62)         | 39/262                                          | 0.88 (0.39,2.02)         |
|              | <i>per log<sub>10</sub>-unit increase</i> | 53/1161                                    | 1.30 (0.52,3.24)         | 135/1079                                        | 1.31 (0.68,2.54)         |
| <b>PFOS</b>  |                                           |                                            |                          |                                                 |                          |
|              | <i>Q1</i>                                 | 8/298                                      | Ref                      | 18/288                                          | Ref                      |
|              | <i>Q2</i>                                 | 15/289                                     | 1.87 (0.73,4.83)         | 35/269                                          | 2.13 (1.10,4.12)         |
|              | <i>Q3</i>                                 | 13/291                                     | 1.61 (0.59,4.39)         | 40/264                                          | 2.19 (1.11,4.32)         |
|              | <i>Q4</i>                                 | 17/283                                     | 2.33 (0.83,6.58)         | 42/258                                          | 2.58 (1.25,5.32)         |
|              | <i>per log<sub>10</sub>-unit increase</i> | 53/1161                                    | 3.15 (0.95,10.44)        | 135/1079                                        | 2.18 (0.96,4.95)         |
| <b>PFHxS</b> |                                           |                                            |                          |                                                 |                          |
|              | <i>Q1</i>                                 | 9/293                                      | ref                      | 15/287                                          | ref                      |
|              | <i>Q2</i>                                 | 13/292                                     | 1.06 (0.41,2.71)         | 24/281                                          | 1.27 (0.61,2.63)         |
|              | <i>Q3</i>                                 | 19/283                                     | 1.40 (0.54,3.65)         | 42/260                                          | 1.59 (0.76,3.34)         |
|              | <i>Q4</i>                                 | 12/293                                     | 0.81 (0.27,2.47)         | 54/251                                          | 1.32 (0.59,2.93)         |
|              | <i>per log<sub>10</sub>-unit increase</i> | 53/1161                                    | 1.14 (0.45,2.88)         | 135/1079                                        | 1.37 (0.75,2.51)         |
| <b>PFNA</b>  |                                           |                                            |                          |                                                 |                          |
|              | <i>Q1</i>                                 | 14/289                                     | ref                      | 20/283                                          | ref                      |
|              | <i>Q2</i>                                 | 13/295                                     | 0.76 (0.32,1.78)         | 29/279                                          | 0.85 (0.43,1.68)         |
|              | <i>Q3</i>                                 | 17/285                                     | 0.86 (0.35,2.08)         | 46/256                                          | 0.81 (0.40,1.65)         |
|              | <i>Q4</i>                                 | 9/292                                      | 0.40 (0.13,1.25)         | 40/261                                          | 0.59 (0.26,1.33)         |
|              | <i>per log<sub>10</sub>-unit increase</i> | 53/1161                                    | 0.41 (0.14,1.21)         | 135/1079                                        | 0.48 (0.22,1.05)         |

Abbreviations: PFOA (perfluorooctanoate), PFOS (perfluorooctane sulfonate), PFHxS (perfluorohexane sulfonate), PFNA (perfluorononanoate).

<sup>a</sup>All models adjusted for all PFAS shown in this table, subcohort, country of birth, pre-pregnancy BMI, previous breastfeeding, parity, gestational week at blood extraction, physical activity, rMED (relative Mediterranean Diet Score).

**Table S3. Multipollutant-adjusted associations between PFAS plasma concentrations and metabolic serum biomarkers in pregnant women.**

|                                           | <b>Log- Triglycerides<br/>(mg/dL)<br/>(n=1168)</b> | <b>Total Cholesterol<br/>(mg/dL) (n=1168)</b> | <b>Log- C-Reactive<br/>Protein (mg/dL)<br/>(n=640)</b> |
|-------------------------------------------|----------------------------------------------------|-----------------------------------------------|--------------------------------------------------------|
|                                           | <b>% change (95%CI)<sup>a</sup></b>                | <b>% change (95%CI)<sup>a</sup></b>           | <b>% change (95%CI)<sup>a</sup></b>                    |
| <b>PFOA</b>                               |                                                    |                                               |                                                        |
| <i>Q1</i>                                 | ref                                                | ref                                           | ref                                                    |
| <i>Q2</i>                                 | 1.51 (-5.82, 9.42)                                 | 2.49 (0.03, 5.01)                             | -9.52 (-25.92, 10.52)                                  |
| <i>Q3</i>                                 | 3.05 (-5.82, 11.63)                                | 2.43 (-0.29, 5.28)                            | 2.02 (-22.89, 17.35)                                   |
| <i>Q4</i>                                 | 4.08 (-5.82, 15.03)                                | 3.25 (0.04, 6.60)                             | 10.52 (-17.30, 46.23)                                  |
| <i>per log<sub>10</sub>-unit increase</i> | -1.42 (-4.14, 8.07)                                | 2.04 (0.20,3.93)                              | 4.32 (-10.67, 22.70)                                   |
| <b>PFOS</b>                               |                                                    |                                               |                                                        |
| <i>Q1</i>                                 | ref                                                | Ref                                           | Ref                                                    |
| <i>Q2</i>                                 | -5.82 (-12.19, 2.02)                               | -0.67 (-2.96, 1.67)                           | 7.25 (-11.31, 31.00)                                   |
| <i>Q3</i>                                 | -6.76 (-13.93, 1.01)                               | -1.09 (-3.52, 1.34)                           | -4.88 (-22.89, 17.35)                                  |
| <i>Q4</i>                                 | -6.76 (-14.79, 1.01)                               | 0.18 (-2.45, 2.88)                            | -3.92 (-23.66, 20.92)                                  |
| <i>per log<sub>10</sub>-unit increase</i> | -4.30 (-9.91, 1.10)                                | 1.17 (-0.68, 3.05)                            | -9.91 (-23.17, 5.07)                                   |
| <b>PFHxS</b>                              |                                                    |                                               |                                                        |
| <i>Q1</i>                                 | ref                                                | ref                                           | Ref                                                    |
| <i>Q2</i>                                 | -2.96 (-9.52, 5.13)                                | 0.71 (-1.63, 3.11)                            | 3.05 (-16.47, 27.12)                                   |
| <i>Q3</i>                                 | -1.00 (-1.00, 7.25)                                | -0.23 (-2.76, 2.37)                           | -5.82 (-25.17, 18.53)                                  |
| <i>Q4</i>                                 | -1.98 (-10.42, 8.33)                               | -0.31 (-3.19, 2.63)                           | -1.00 (-23.66, 28.40)                                  |
| <i>per log<sub>10</sub>-unit increase</i> | -0.72 (-6.26, 71.32)                               | -1.28 (-3.07, 0.55)                           | -6.93 (-12.75, 31.36)                                  |
| <b>PFNA</b>                               |                                                    |                                               |                                                        |
| <i>Q1</i>                                 | ref                                                | ref                                           | ref                                                    |
| <i>Q2</i>                                 | -4.88 (-11.31, 2.02)                               | 0.19 (-2.15, 2.59)                            | 2.02 (-18.94, 28.40)                                   |
| <i>Q3</i>                                 | -4.88 (-13.06, 3.05)                               | 0.05 (-2.56, 2.73)                            | -7.69 (-28.82, 19.72)                                  |
| <i>Q4</i>                                 | -3.92 (-13.06, 5.13)                               | 0.07 (-2.96, 3.18)                            | -4.88 (-29.53, 28.40)                                  |
| <i>per log<sub>10</sub>-unit increase</i> | -3.58 (-8.72, 1.84)                                | -1.08 (-2.88, 0.72)                           | 5.62 (-10.91, 25.99)                                   |

Abbreviations: PFOA (perfluorooctanoate), PFOS (perfluorooctane sulfonate), PFHxS (perfluorohexane sulfonate), PFNA (perfluorononanoate).

<sup>a</sup> Effect estimates from the linear regression models expressed as % change in medians per quartile group or log<sub>10</sub>-unit increase in exposure. All models adjusted for all PFAS shown in this table, subcohort, country of birth, pre-pregnancy BMI, previous breastfeeding, parity, gestational week at blood extraction, physical activity, rMED (relative Mediterranean Diet Score).
